# Supplementary material for: The libRadtran software package for radiative transfer calculations (version 2.0.1)
Source: Copernicus journal article supplement (doi:10.5194/gmd-9-1647-2016), 2016-05-03
Supplement: Supplementary file [file gmd-9-1647-2016-supplement-title-page.pdf › gmd-9-1647-2016-supplement-title-page.pdf]

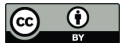

## *Supplement of*

# **The libRadtran software package for radiative transfer calculations (version 2.0.1)**

**Claudia Emde et al.**

*Correspondence to:* Claudia Emde ([claudia.emde@lmu.de](mailto:claudia.emde@lmu.de))

- [gmd-9-1647-2016-supplement-title-page.pdf](#)
- Fig\_10
  - Fig\_10.pdf
  - README
  - ic.dat
  - mystic.inp
  - plot\_Fig\_10.py
  - polarization\_example.pdf
  - radiance.npy
  - run\_polarization.py
  - std.npy
  - wc.dat
- Fig\_11
  - README
  - blaettner\_fig5.pdf
  - input
  - mystic\_run.inp
  - output
  - plot.py
  - rad\_500.npy
  - rad\_700.npy
  - run.py
  - std\_500.npy
  - std\_700.npy

- Fig\_7
  - Plot.py
  - README
  - SLIT\_0.3.dat
  - UVSPEC\_FLUORESCENCE\_670\_700\_fluor.OUT
  - UVSPEC\_FLUORESCENCE\_670\_700\_fluor.OUTc\_0.3
  - UVSPEC\_FLUORESCENCE\_670\_700\_fluor\_trans.OUT
  - UVSPEC\_FLUORESCENCE\_670\_700\_nofluor.OUT
  - UVSPEC\_FLUORESCENCE\_670\_700\_nofluor.OUTc\_0.3
  - UVSPEC\_FLUORESCENCE\_kurucz\_670\_810\_trans\_0.01
  - spectrum\_flex.inp

- Fig\_8
  - MtKelud2014.CH4.xml
  - MtKelud2014.CO.xml
  - MtKelud2014.CO2.xml
  - MtKelud2014.H2O.xml
  - MtKelud2014.N2O.xml
  - MtKelud2014.O3.xml
  - MtKelud2014.SO2.xml
  - MtKelud2014.t.xml
  - MtKelud2014.z.xml
  - MtKelud2014\_uvspec\_atmmod.inp
  - MtKelud2014\_uvspec\_surface\_temperature.inp
  - README
  - andesite\_refract\_index\_Pollack.dat
  - input.arts
  - mie.inp
  - profile\_1.ash
  - profile\_1.ice
  - profile\_2.ash
  - profile\_2.ice
  - seawat10\_emissivity.alb
  - uvspec\_ash.inp
  - uvspec\_ash.out
  - uvspec\_ash\_ice.inp
  - uvspec\_ash\_ice.out
  - uvspec\_clear.inp
  - uvspec\_clear.out
  - uvspec\_ice.inp
  - uvspec\_ice.out

- Fig\_9
  - Fig\_9.inp
  - README

The copyright of individual parts of the supplement might differ from the CC-BY 3.0 licence.
