# Supplementary figures and images for: The libRadtran software package for radiative transfer calculations (version 2.0.1)
Source: Copernicus journal article supplement (doi:10.5194/gmd-9-1647-2016), 2016-05-03

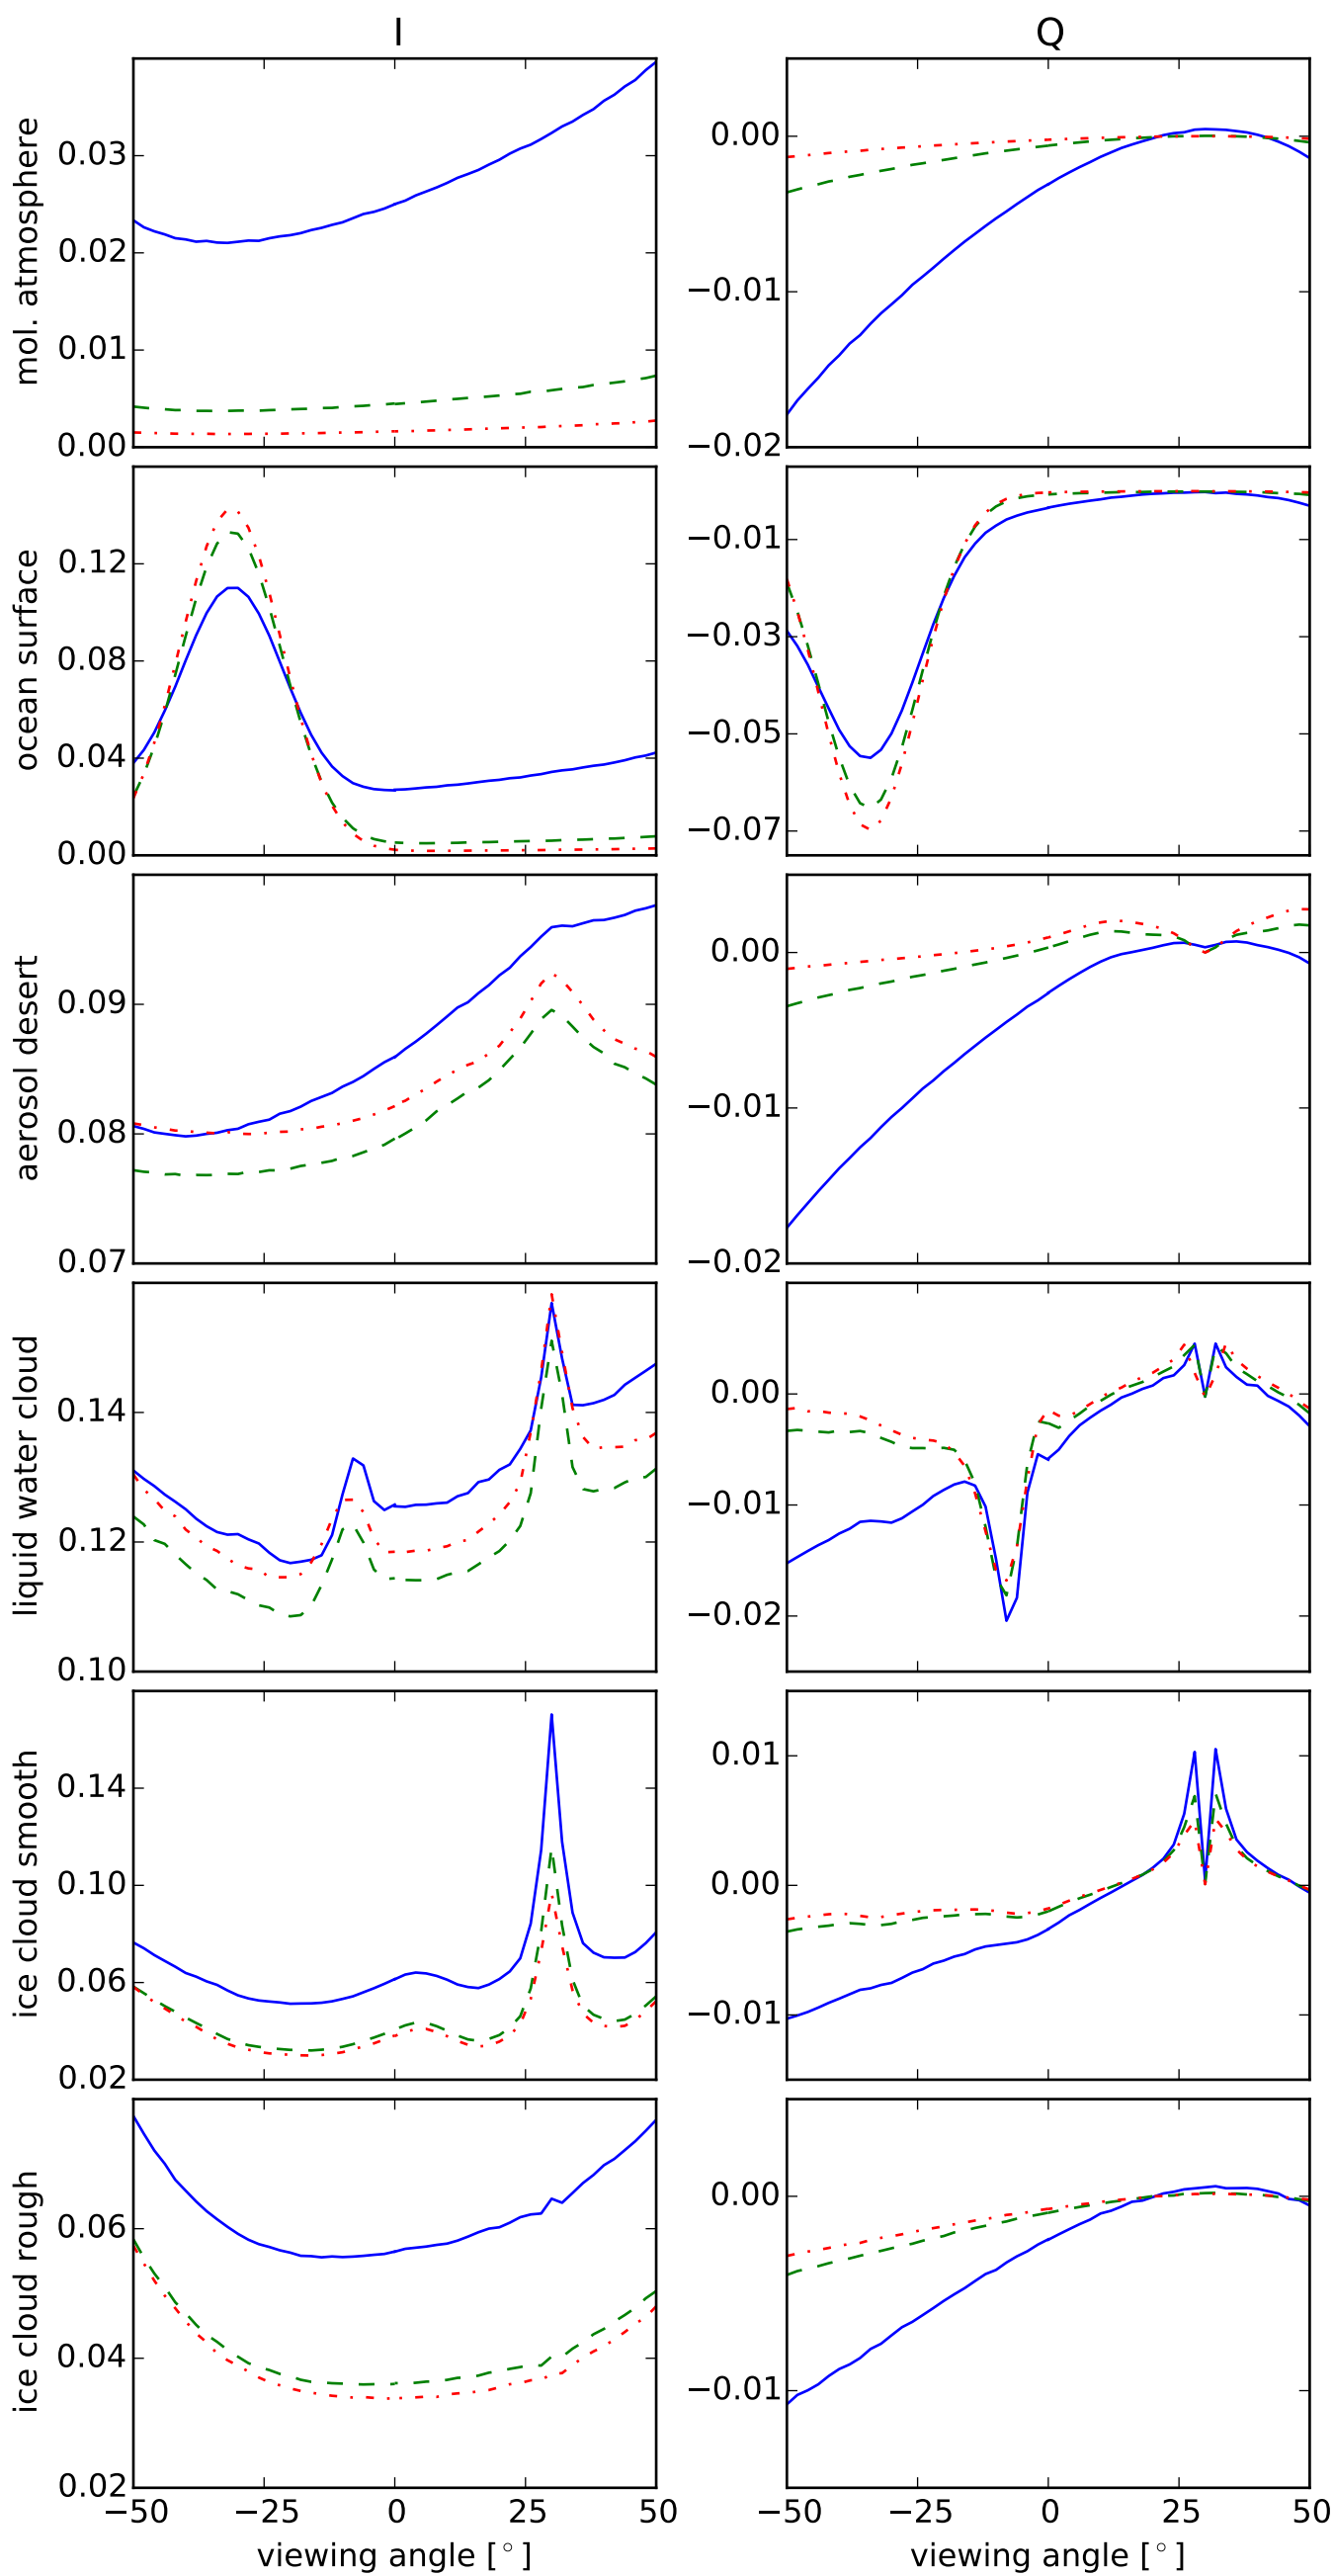

Supplement: Supplementary file 1 [file Fig_10.pdf › Fig_10/Fig_10.pdf]

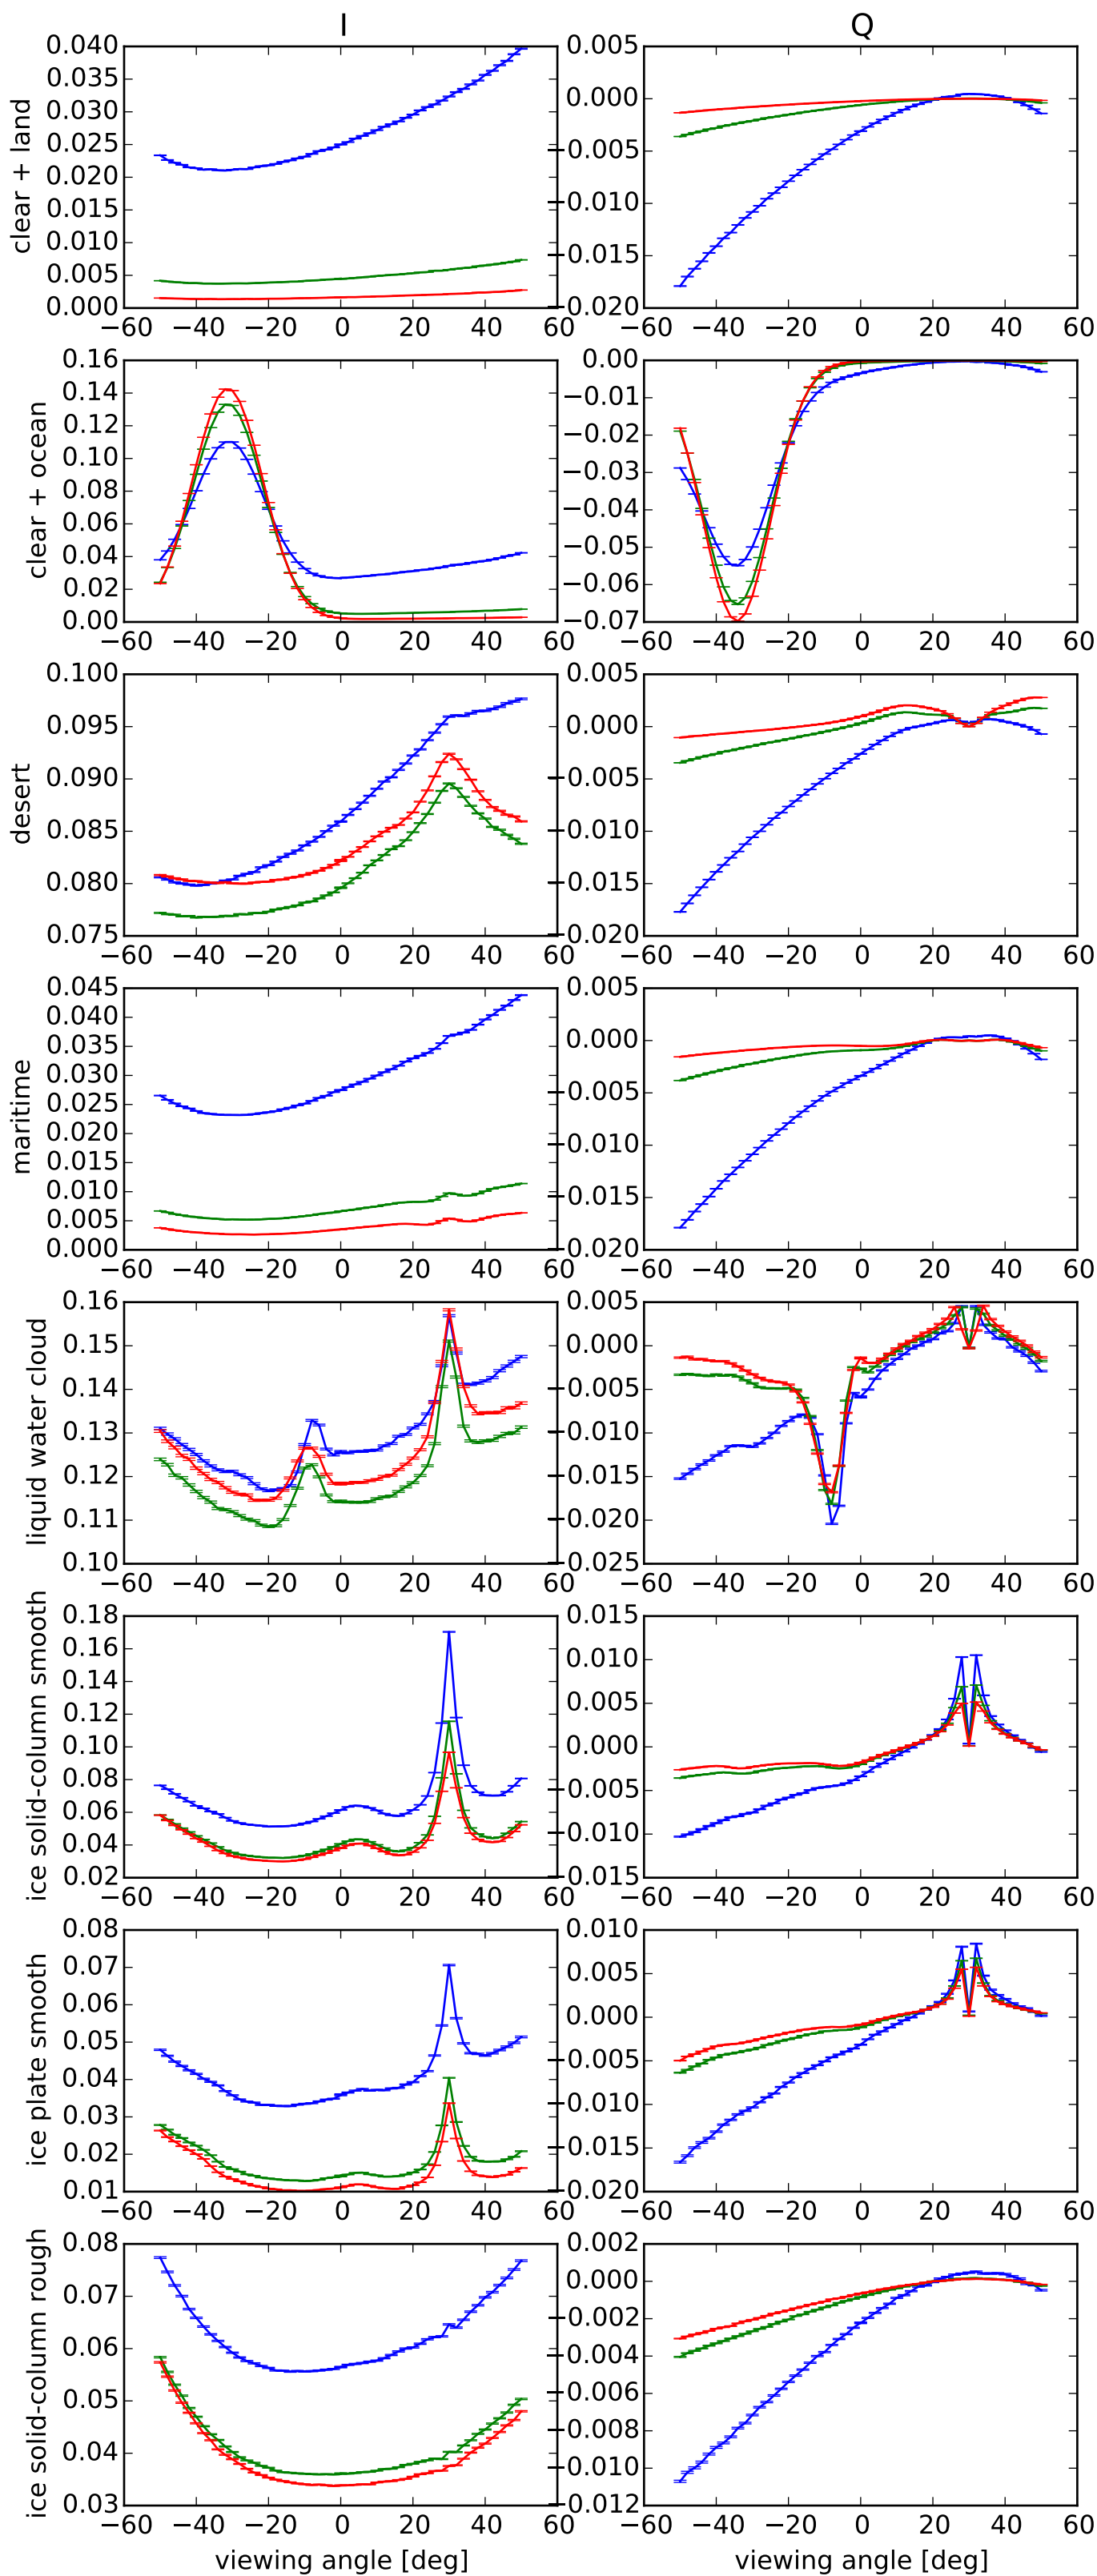

Supplement: Supplementary file 2 [file polarization_example.pdf › Fig_10/polarization_example.pdf]

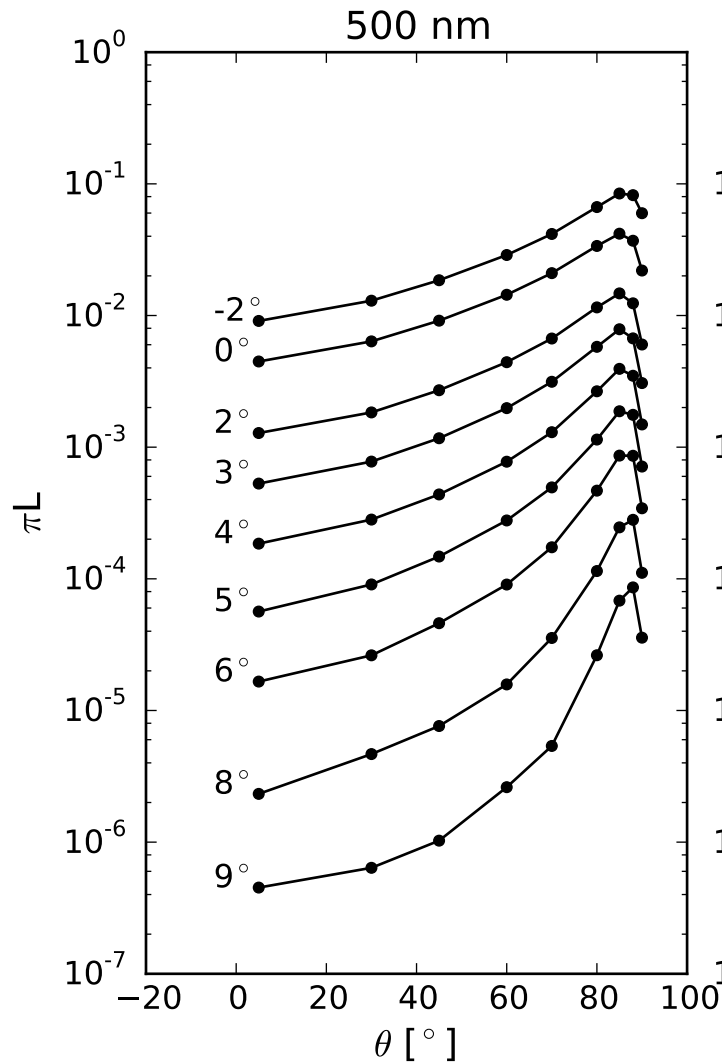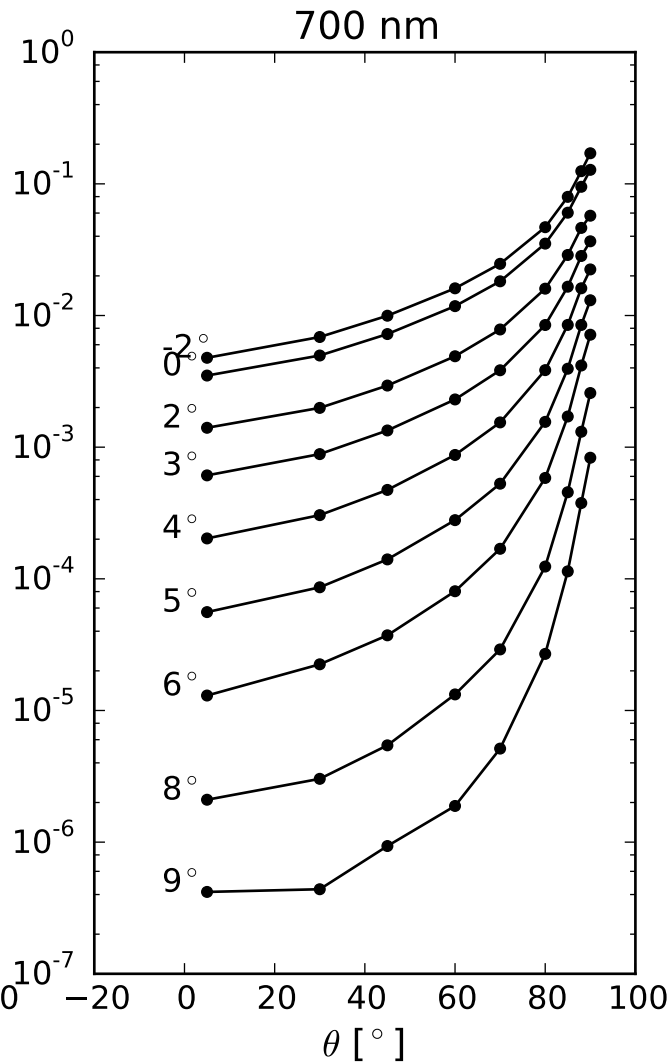

Supplement: Supplementary file 3 [file blaettner_fig5.pdf › Fig_11/blaettner_fig5.pdf]
